# Supplementary material for: Implementing a comprehensive translational oncology platform: from molecular testing to actionability
Source: Springer Nature journal article supplement (doi:10.1186/s12967-018-1733-y), 2018-12-01
Supplement: MOESM1 [file 16343594]

Figure S1. GeneTrails Comprehensive Solid Tumor Panel

|        |         |          |        |          |        |
|--------|---------|----------|--------|----------|--------|
| AKT1   | CDKN1B  | FANCM    | KIT    | NTRK1    | RAD51D |
| AKT2   | CDKN2A  | FGF18    | KRAS   | NTRK2    | RAD52  |
| AKT3   | CHEK1   | FGF19    | MAP2K1 | NTRK3    | RAD54L |
| ALK    | CHEK2   | FGF3     | MAP2K2 | PALB2    | RAF1   |
| APC    | CTNNB1  | FGF4     | MAP2K4 | PDCD1LG2 | RASA1  |
| AR     | DDR2    | FGFR1    | MAPK1  | PDGFRA   | RB1    |
| ARAF   | DDX11   | FGFR2    | MDC1   | PIK3CA   | RET    |
| ARID1A | EGFR    | FGFR3    | MDM2   | PIK3CB   | RICTOR |
| ATM    | ERBB2   | FGFR4    | MDM4   | PIK3R1   | RIT1   |
| ATR    | ERBB3   | GNA11    | MET    | PMS1     | ROS1   |
| BAP1   | ERBB4   | GNAQ     | MLH1   | PMS2     | RPTOR  |
| BARD1  | ERCC2   | GNAS     | MLH3   | POLE     | STAG2  |
| BRAF   | ERCC5   | HIST1H3B | MRE11A | PPP2R1A  | STAT3  |
| BRCA1  | ESR1    | HRAS     | MSH2   | PPP6C    | STK11  |
| BRCA2  | FAM175A | IDH1     | MSH6   | PTCH1    | TOP1   |
| BRIP1  | FANCA   | IDH2     | MTOR   | PTEN     | TP53   |

Table S1. List of Genomic Alterations per MM-TERT Patient

|            |                                                                                                                                                                                                                                                                                                                                                                                                                                                                                                                                                                                                           |
|------------|-----------------------------------------------------------------------------------------------------------------------------------------------------------------------------------------------------------------------------------------------------------------------------------------------------------------------------------------------------------------------------------------------------------------------------------------------------------------------------------------------------------------------------------------------------------------------------------------------------------|
| <b>101</b> | <p>PIK3CA p.E542K (~43% mutant allele)<br/>           CDKN2A gene copy number loss (~1.0 copy)<br/>           ATM gene copy number loss (~0.5 copies)<br/>           Chr 11 regional amplification, including CCND1, FGF19, FGF3, and FGF4 (~9-30 copies - CCND1 highest)<br/>           Chr 1 regional amplification, including MDM4 and DDR2 (~6-7 copies)<br/>           Chr 11 regional loss, including CHEK1 and MRE11 (~0.6-0.7 copies)<br/>           Chr 8 regional loss, including FGFR1, IDO1 and IDO2 (~0.5 copies each)<br/>           Chr 17 regional loss, including RAD51D (~1.0 copy)</p> |
| <b>104</b> | <p>PIK3CA p.E542K<br/>           CDKN2A copy number loss<br/>           Chr11 regional amplification (CCND1 and FGF19)</p>                                                                                                                                                                                                                                                                                                                                                                                                                                                                                |
| <b>105</b> | <p>PIK3CA p.E542K<br/>           PTEN copy number loss<br/>           TP53 copy number loss<br/>           CDKN2A copy number loss</p>                                                                                                                                                                                                                                                                                                                                                                                                                                                                    |
| <b>106</b> | <p>PIK3CA p.C420R and copy number gain<br/>           TP53 p.P250L</p>                                                                                                                                                                                                                                                                                                                                                                                                                                                                                                                                    |
| <b>109</b> | <p>CDKN2A copy number loss</p>                                                                                                                                                                                                                                                                                                                                                                                                                                                                                                                                                                            |
| <b>110</b> | <p>CHEK2 p.T367fs*15<br/>           MYC copy number gain<br/>           FANCA copy number loss</p>                                                                                                                                                                                                                                                                                                                                                                                                                                                                                                        |
| <b>111</b> | <p>PIK3CA p.H1047R<br/>           TP53 p.E285<br/>           ERBB3 copy number gain<br/>           FGF19 copy number gain</p>                                                                                                                                                                                                                                                                                                                                                                                                                                                                             |
| <b>113</b> | <p>PTEN p.T319fs*1 and copy number loss</p>                                                                                                                                                                                                                                                                                                                                                                                                                                                                                                                                                               |
| <b>114</b> | <p>RAD51D p.S207L<br/>           FGFR2 p.N550K<br/>           PIK3CA p.E542K<br/>           mTOR p.M2089I, p.I1094M and p.D907H<br/>           PTEN splice site mutation and p.P248fs*2<br/>           STK11 p.S69*<br/>           PIK3CA p.P104_G106delinsR<br/>           CASP8 p.S403*<br/>           ARID1A p.Q1424*</p>                                                                                                                                                                                                                                                                              |

|            |                                                                                                                                                                                                                               |
|------------|-------------------------------------------------------------------------------------------------------------------------------------------------------------------------------------------------------------------------------|
| <b>115</b> | PTEN gene copy number loss<br>CCND1 gene copy number gain (8 copies)<br>CDKN2A copy number loss (0 copies)<br>Chr 8 regional amplification, including FGFR1 (23 copies), IDO2 (16 copies), IDO1 (8 copies) and MYC (5 copies) |
| <b>116</b> | CDKN2A copy number loss (0.8 copies)<br>BRCA2 copy number loss (0.8 copies)                                                                                                                                                   |
| <b>117</b> | TP53 p.R248W                                                                                                                                                                                                                  |
| <b>201</b> | TP53 copy loss<br>TMPRSS2-ERG gene fusion                                                                                                                                                                                     |
| <b>204</b> | PTEN p.C71fs*30<br>ATR p.I2164M                                                                                                                                                                                               |
| <b>207</b> | CTNNB1 p.T41A<br>CDKN2A copy number loss<br>Chr 11 regional amplification, including CCND1, FGF19 and MRE11A                                                                                                                  |
| <b>208</b> | AR gene amplification<br>MYC copy number increase<br>CHEK1 copy number loss<br>ATM copy number loss<br>Chr 11 regional gain, including CCND1, FGF19, FGF3, and FGF4                                                           |
| <b>211</b> | PTEN p.S170fs*13<br>RB1 copy number loss                                                                                                                                                                                      |
| <b>212</b> | ERCC2 splice site mutation<br>AR gene amplification<br>ATM splice site mutation and copy loss                                                                                                                                 |
| <b>213</b> | CDK12 p.R221fs*6<br>CDKN2A gene copy number loss (0.2 copies)<br>ERCC5 gene copy number loss (0.2 copies)<br>TMPRSS2-ERG gene fusion                                                                                          |
| <b>214</b> | ATM p.I1476fs*15<br>PTEN p.T277fs*21<br>ERCC5 p.S470*<br>Chr 11 regional gain, including CCND1, FGF19, FGF4 and FGF3 genes (~9-15 copies)                                                                                     |
| <b>215</b> | RAD50 p.D1294N<br>TP53 p.K132N<br>AR gene amplification<br>TMPRSS2-ERG gene fusion                                                                                                                                            |

|            |                                                                                           |
|------------|-------------------------------------------------------------------------------------------|
| <b>218</b> | TP53 p.R175H<br>AR gene amplification<br>PTEN copy number loss<br>TMPRSS2-ERG gene fusion |
| <b>301</b> | KRAS p.G12D<br>TP53 p.P151H                                                               |
